# Supplementary material for: Clinical implications of TP53 mutations in myelodysplastic syndromes treated with hypomethylating agents
Source: PubMed Central journal article supplement (PMC4924706; doi:10.18632/oncotarget.7290), 2016-02-09
Supplement: oncotarget-07-14172-s001.pdf [file oncotarget-07-14172-s001.pdf]

## SUPPLEMENTARY MATERIALS AND METHODS

### Variant calling and filtering

For variant calling, sequencing data were aligned to the hg19 human genome reference using Burrows-Wheeler Aligner (BWA) followed by mark duplication, in-del realignment, and base recalibration using GATK best practices tools (<https://www.broadinstitute.org/gatk/guide/best-practices?bpm=DNaseq>). [1] The resulting BAM files were preprocessed, and base substitutions and small insertions/deletions were called using Mutect and Pindel, respectively, against an unmatched normal sample, as previously described. [2-4] The called variants were annotated using ANNOVAR and then filtered for potential single nucleotide polymorphisms (SNPs) based on the dbSNP (<http://www.ncbi.nlm.nih.gov/SNP/>), 1000 genome project (<http://www.1000genomes.org/>), and ESP 6500 (<http://evs.gs.washington.edu/EVS/>) databases. [5]

### SUPPLEMENTARY REFERENCES

1. Li H, Durbin R: Fast and accurate short read alignment with Burrows-Wheeler transform. *Bioinformatics* 25:1754-60, 2009
2. Cibulskis K, Lawrence MS, Carter SL, et al: Sensitive detection of somatic point mutations in impure and heterogeneous cancer samples. *Nat Biotechnol* 31:213-9, 2013
3. Ye K, Schulz MH, Long Q, et al: Pindel: a pattern growth approach to detect break points of large deletions and medium sized insertions from paired-end short reads. *Bioinformatics* 25:2865-71, 2009
4. Takahashi K, Roh W, Zhang J, et al: Clonal evolution of acute myeloid leukemia relapsed after 19 years of remission. *Am J Hematol* 90:E134-5, 2015
5. Wang K, Li M, Hakonarson H: ANNOVAR: functional annotation of genetic variants from high-throughput sequencing data. *Nucleic Acids Res* 38:e164, 2010

## SUPPLEMENTARY FIGURES AND TABLES

**Supplementary Table S1: Summary of the HMA therapy regimen that 168 patients with MDS/CMML received upfront**

| Therapy regimen            | N = 168 (%) |
|----------------------------|-------------|
| Azacitidine SOC            | 38 (23)     |
| Decitabine SOC             | 40 (24)     |
| Azacitidine + Birinapant   | 1 (<1)      |
| Azacitidine + GM-CSF       | 3 (2)       |
| Azacitidine + Lenalidomide | 20 (12)     |
| Azacitidine + Panobinostat | 1 (<1)      |
| Azacitidine + PKC412       | 1 (<1)      |
| Azacitidine + Pracinostat  | 18 (11)     |
| Azacitidine + Rigorsetib   | 1 (<1)      |
| Azacitidine + Ruxolitinib  | 4 (2)       |
| Azacitidine + Vorinostat   | 19 (11)     |
| Decitabine + Sapacitabine  | 1 (<1)      |
| Decitabine + Clofarabine   | 3 (2)       |
| Decitabine + Vosaroxin     | 7 (4)       |
| Guadecitabine (SGI-110)    | 11 (7)      |

**Supplementary Table S2: List of genes sequenced by either 28 gene panel or 53 gene panel NGS platform. Genes overlapped between the 2 methods are underlined**

| 28 gene panel |               | 53 gene panel |               |               |                |
|---------------|---------------|---------------|---------------|---------------|----------------|
| <i>ABL1</i>   | <i>KRAS</i>   | <i>ABL1</i>   | <i>FBXW7</i>  | <i>KIT</i>    | <i>SMAD4</i>   |
| <i>ASXL1</i>  | <i>MDM2</i>   | <i>AKT1</i>   | <i>FGFR1</i>  | <i>KLHL6</i>  | <i>SMARCB1</i> |
| <i>BRAF</i>   | <i>MLL</i>    | <i>ALK</i>    | <i>FGFR2</i>  | <i>KRAS</i>   | <i>SMO</i>     |
| <i>DNMT3A</i> | <i>MPL</i>    | <i>APC</i>    | <i>FGFR3</i>  | <i>MET</i>    | <i>SRC</i>     |
| <i>EGFR</i>   | <i>MYD88</i>  | <i>ATM</i>    | <i>FLT3</i>   | <i>MLH1</i>   | <i>STK11</i>   |
| <i>EZH2</i>   | <i>NOTCH1</i> | <i>BRAF</i>   | <i>GNA11</i>  | <i>MPL</i>    | <i>TP53</i>    |
| <i>FLT3</i>   | <i>NPM1</i>   | <i>CDH1</i>   | <i>GNAQ</i>   | <i>NOTCH1</i> | <i>VHL</i>     |
| <i>GATA1</i>  | <i>NRAS</i>   | <i>CDKN2A</i> | <i>GNAS</i>   | <i>NPM1</i>   | <i>XPO1</i>    |
| <i>GATA2</i>  | <i>PTPN11</i> | <i>CSF1R</i>  | <i>HNFI1A</i> | <i>NRAS</i>   |                |
| <i>HRAS</i>   | <i>RUNX1</i>  | <i>CTNNB1</i> | <i>HRAS</i>   | <i>PDGFRA</i> |                |
| <i>IDH1</i>   | <i>TET2</i>   | <i>DNMT3A</i> | <i>IDH1</i>   | <i>PIK3CA</i> |                |
| <i>IDH2</i>   | <i>TP53</i>   | <i>EGFR</i>   | <i>IDH2</i>   | <i>PTEN</i>   |                |
| <i>IKZF2</i>  | <i>WT1</i>    | <i>ERBB2</i>  | <i>JAK2</i>   | <i>PTPN11</i> |                |
| <i>JAK2</i>   |               | <i>ERBB4</i>  | <i>JAK3</i>   | <i>RB1</i>    |                |
| <i>KIT</i>    |               | <i>EZH2</i>   | <i>KDR</i>    | <i>RET</i>    |                |

**Supplementary Table S3: Treatment response by *TP53* mutation status in a subgroup of patients treated with standard of care HMA or HMA combination with investigational agents**

|                 |                     | CR | no CR | P    | OR | no OR | P    |
|-----------------|---------------------|----|-------|------|----|-------|------|
| SOC HMA         | <i>TP53</i> mutated | 4  | 7     | 0.39 | 5  | 6     | 0.25 |
|                 | <i>TP53</i> WT      | 18 | 48    |      | 20 | 46    |      |
| HMA combination | <i>TP53</i> mutated | 9  | 18    | 0.62 | 11 | 16    | 0.47 |
|                 | <i>TP53</i> WT      | 18 | 46    |      | 21 | 43    |      |

**Supplementary Table S4: Association between treatment response and various myeloid driver mutations**

| Mutation (/tested)        | Mutation rate (%) | CR rate (%<br>mutated vs.<br>WT) | P   | OR rate (%<br>mutated<br>vs. WT) | P   |
|---------------------------|-------------------|----------------------------------|-----|----------------------------------|-----|
| <i>ASXL1</i> (/79)        | 17                | 23% vs. 33%                      | .35 | 23% vs. 36%                      | .28 |
| <i>BCOR/BCORL1</i> (/53)  | 6                 | 67% vs. 32%                      | .26 | 67% vs. 36%                      | .32 |
| <i>CBL</i> (/53)          | 13                | 43% vs. 32%                      | .45 | 43% vs. 37%                      | .54 |
| <i>CUX1</i> (/53)         | 6                 | 33% vs. 67%                      | .74 | 33% vs. 38%                      | .68 |
| <i>DNMT3A</i> (/168)      | 6                 | 10% vs. 30%                      | .16 | 10% vs. 35%                      | .09 |
| <i>EZH2</i> (/168)        | 2                 | 33% vs. 29%                      | .65 | 3% vs. 34%                       | .73 |
| <i>IDH1</i> (/168)        | 3                 | 40% vs. 29%                      | .46 | 40% vs. 34%                      | .55 |
| <i>IDH2</i> (/168)        | 6                 | 30% vs. 29%                      | .60 | 30% vs. 34%                      | .54 |
| <i>KRAS</i> (/168)        | 4                 | 17% vs. 30%                      | .44 | 17% vs. 34%                      | .34 |
| <i>NRAS</i> (/168)        | 4                 | 0% vs. 30%                       | .09 | 0% vs. 35%                       | .05 |
| <i>PTPN11</i> (/168)      | 4                 | 43% vs. 29%                      | .33 | 43% vs. 34%                      | .44 |
| <i>RUNX1</i> (/79)        | 20                | 25% vs. 33%                      | .38 | 25% vs. 37%                      | .29 |
| <i>SF3B1</i> (/53)        | 4                 | 50% vs. 33%                      | .57 | 50% vs. 37%                      | .62 |
| <i>SRSF2</i> (/53)        | 11                | 17% vs. 36%                      | .33 | 17% vs. 40%                      | .26 |
| <i>TET2</i> (/79)         | 23                | 17% vs. 36%                      | .10 | 22% vs. 38%                      | .18 |
| <i>U2AF1</i> (/53)        | 13                | 29% vs. 35%                      | .56 | 29% vs. 39%                      | .47 |
| <i>ZRSR2</i> (/53)        | 6                 | 0% vs. 36%                       | .28 | 0% vs. 40%                       | .23 |
| <i>KRAS/NRAS</i> (/168)   | 8                 | 8% vs. 31%                       | .06 | 8% vs. 36%                       | .03 |
| <i>IDH1/IDH2</i> (/168)   | 21                | 33% vs. 29%                      | .46 | 33% vs. 34%                      | .60 |
| Splicing gene (/53)       | 34                | 22% vs. 40%                      | .16 | 22% vs. 46%                      | .08 |
| <i>TET2+/ASXL1+</i> (/79) | 4                 | 0% vs. 33%                       | .31 | 0% vs. 36%                       | .28 |
| <i>TET2+/ASXL1-</i> (/79) | 19                | 20% vs. 34%                      | .23 | 27% vs. 36%                      | .36 |

Supplementary Table S5: Univariate analysis for overall survival

| Variables                                                       | Median OS (95%CI)                     | P value |
|-----------------------------------------------------------------|---------------------------------------|---------|
| Age > 70 y (vs. ≤ 70 y)                                         | 13.3 (11.7-14.8) vs. 16.0 (9.0-22.9)  | 0.30    |
| RAEB-T (vs. others)                                             | 13.1 (11.8-17.7) vs. 16.0 (11.6-14.5) | 0.55    |
| Therapy-related (vs. de novo)                                   | 9.0 (5.9-vs. 12.1) vs. 16 (11.3-20.7) | 0.02    |
| Complex karyotype (vs. others)                                  | 10.9 (8.8-12.9) vs. 20.1 (14.0-26.2)  | <0.001  |
| ANC < 0.8 x 10 <sup>9</sup> /L (vs. ≥ 0.8 x 10 <sup>9</sup> /L) | 12.3 (11.7-14.9) vs. 18 (11.0-24.9)   | 0.77    |
| HGB < 8 g/dL (vs. ≥ 8 g/dL)                                     | 10.6 (3.6-17.5) vs. 14.8 (10.6-18.9)  | 0.17    |
| PLT < 50 x 10 <sup>9</sup> /L (vs. ≥ 50 x 10 <sup>9</sup> /L)   | 12.9 (10.4-15.6) vs. 18.0 (12.2-23.7) | 0.12    |
| BM blast >10% (vs. ≤ 10%)                                       | 13.3 (12.1-14.5) vs. 14.8 (11.6-17.9) | 0.65    |
| Monosomal karyotype (vs. others)                                | 10.5 (7.4-13.6) vs. 20.7 (16.4-24.9)  | <0.001  |
| IPSS-R high/very high risk (vs. others)                         | 12.9 (10.7-15.1) vs. 20.7 (1.4-40.3)  | 0.001   |
| HSCT (vs. no HSCT)                                              | 14.2 (9.8-18.7) vs. 14.7 (9.6-19.8)   | 0.30    |
| <i>ASXL1</i> mutated (vs. WT)                                   | NR vs. 14.3 (11.2-17.4)               | 0.78    |
| <i>CBL</i> mutated (vs. WT)                                     | 6.13 (NR) vs. 13.3 (11.9-14.7)        | 0.86    |
| <i>DNMT3A</i> mutated (vs. WT)                                  | 11.0 (7.3-14.8) vs. 14.8 (9.4-20.2)   | 0.81    |
| <i>EZH2</i> mutated (vs. WT)                                    | NR vs. 14.3 (11.5-17.0)               | 0.67    |
| <i>IDH1</i> mutated (vs. WT)                                    | 14.0 (0.0-29.6) vs. 14.8 (10.3-19.2)  | 0.76    |
| <i>IDH2</i> mutated (vs. WT)                                    | 22.9 (NR) vs. 14.3 (11.3-17.2)        | 0.74    |
| <i>KRAS</i> mutated (vs. WT)                                    | 13.2 (0.0-28.5) vs. 14.8 (11.5-18.0)  | 0.77    |
| <i>NRAS</i> mutated (vs. WT)                                    | 8.8 (3.1-14.6) vs. 14.8 (10.4-19.1)   | 0.10    |
| <i>PTPN11</i> mutated (vs. WT)                                  | NR vs. 14.8 (11.8-17.3)               | 0.28    |
| <i>RUNX1</i> mutated (vs. WT)                                   | 9.7 (6.6-12.9) vs. 14.3 (10.8-17.8)   | 0.36    |
| <i>SRSF2</i> mutated (vs. WT)                                   | 6.1 (0.0-15.6) vs. 13.3 (11.4-15.2)   | 0.48    |
| <i>TET2</i> mutated (vs. WT)                                    | 13.2 (6.8-19.6) vs. 14.3 (11.2-17.4)  | 0.62    |
| <i>U2AF1</i> mutated (vs. WT)                                   | 9.7 (6.6-12.8) vs. 13.3 (11.6-15.0)   | 0.27    |
| Splicing gene mutated (vs. WT)                                  | 21.3 (NR) vs. 13.3 (11.3-15.3)        | 0.65    |
| <i>KRAS/NRAS</i> mutated (vs. WT)                               | 13.2 (8.8-17.6) vs. 14.8 (9.2-20.3)   | 0.23    |
| <i>IDH1/2</i> mutated (vs. WT)                                  | 14.8 (13.3-16.3) vs. 14.3 (9.9-18.6)  | 0.90    |

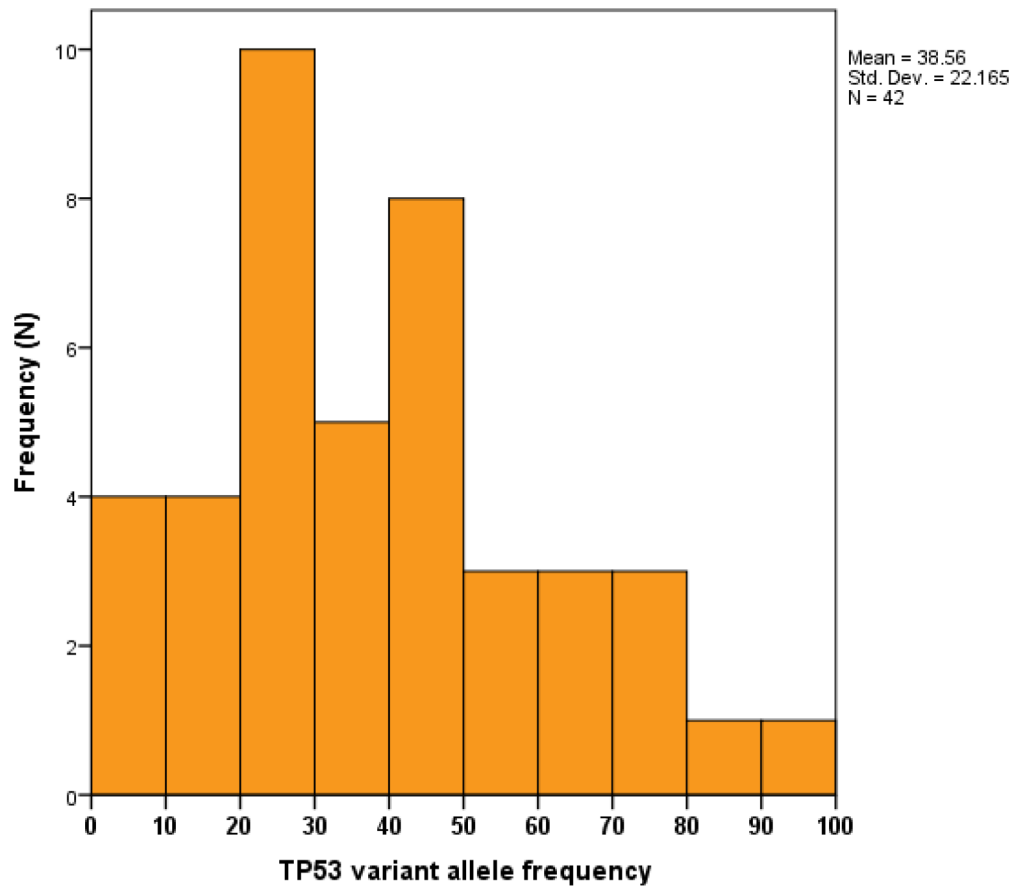

Supplementary Figure S1: Distribution of VAF for *TP53* mutations.

**A.**

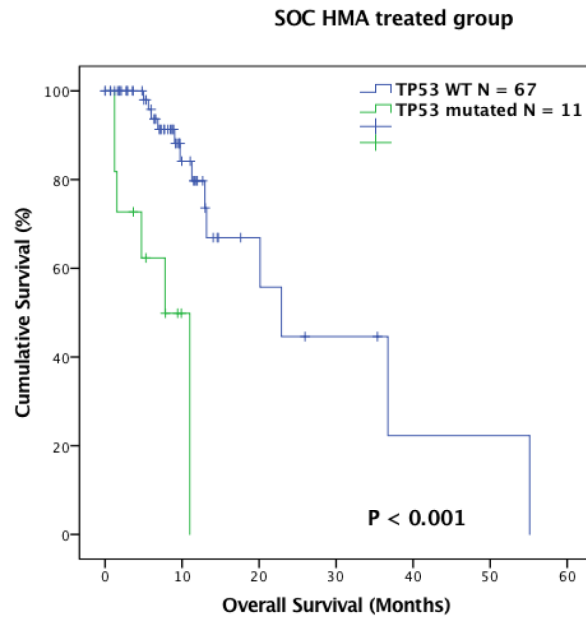

**B.**

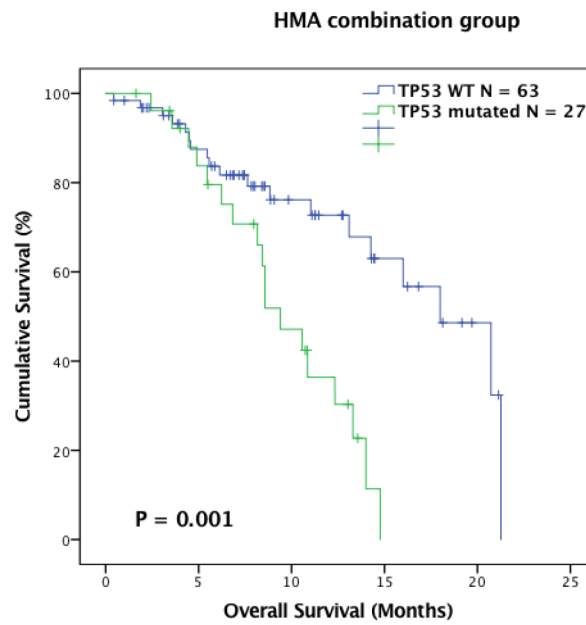

**Supplementary Figure S2: Comparison of overall survival by *TP53* mutation status in A. Patients treated with SOC HMA and in B. patients treated with HMA combination.**



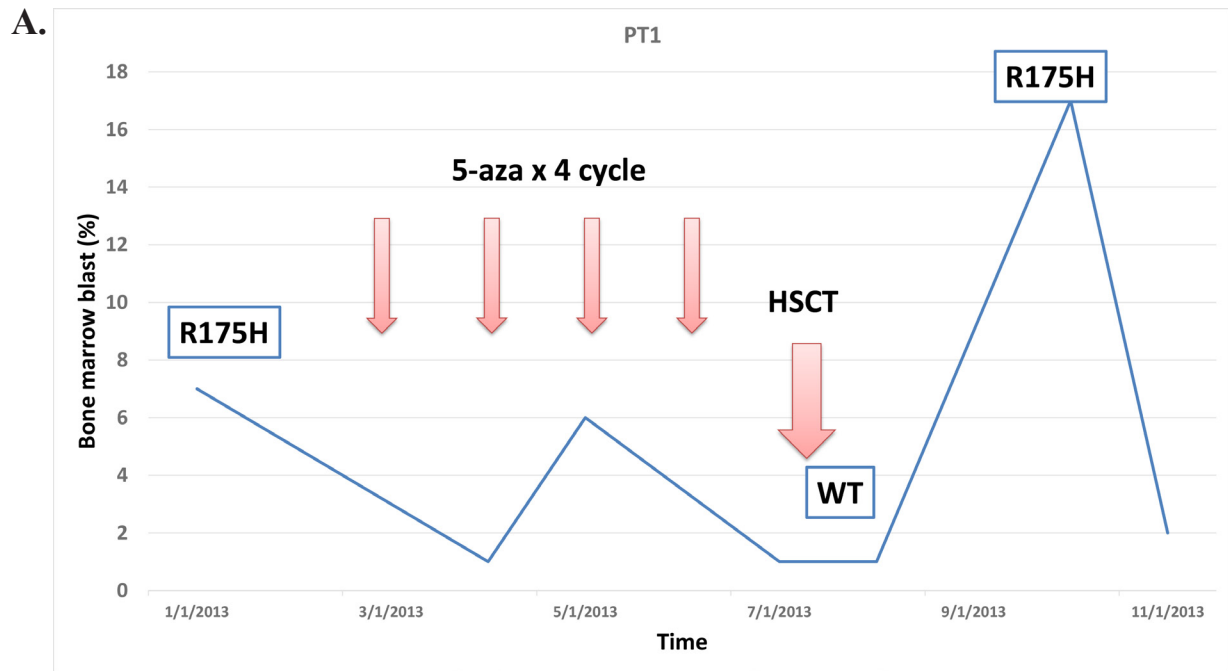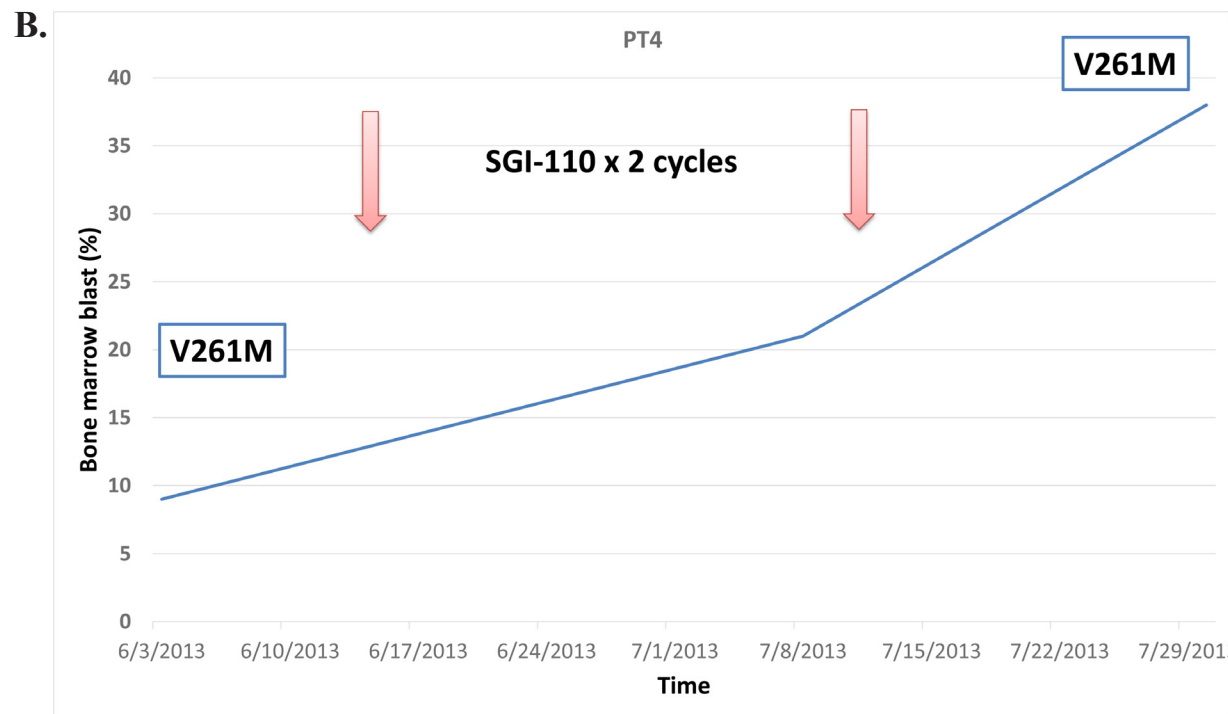

(Continued)

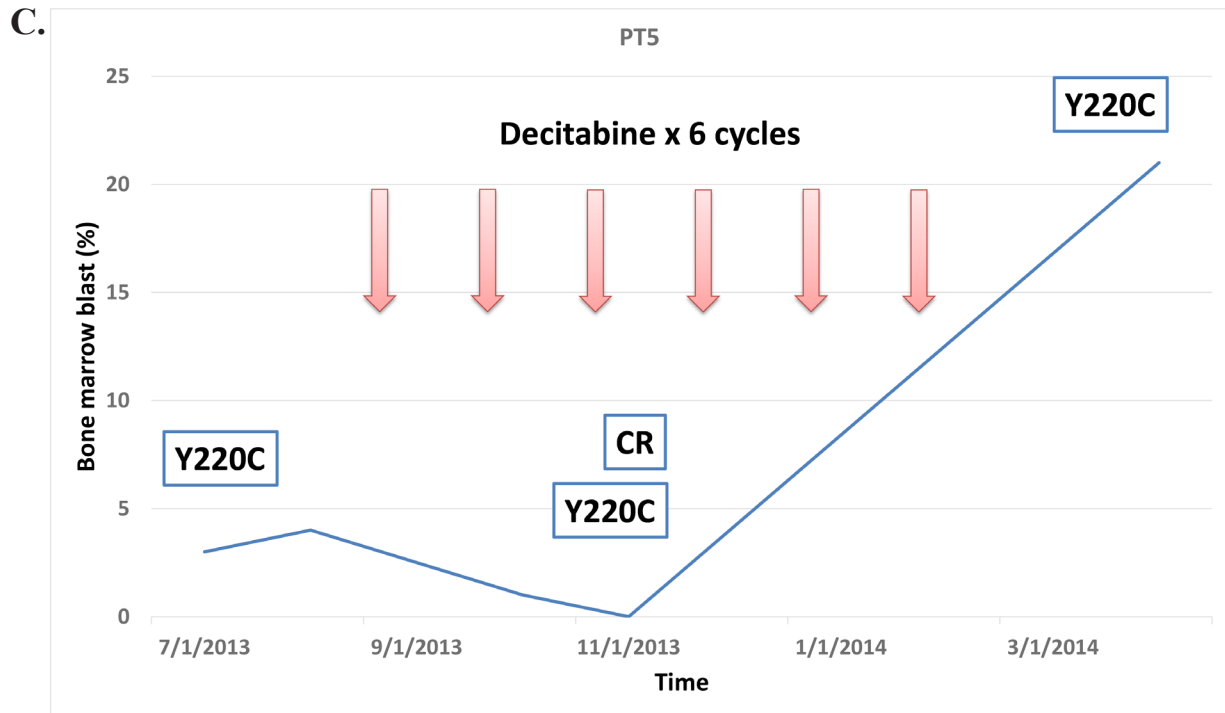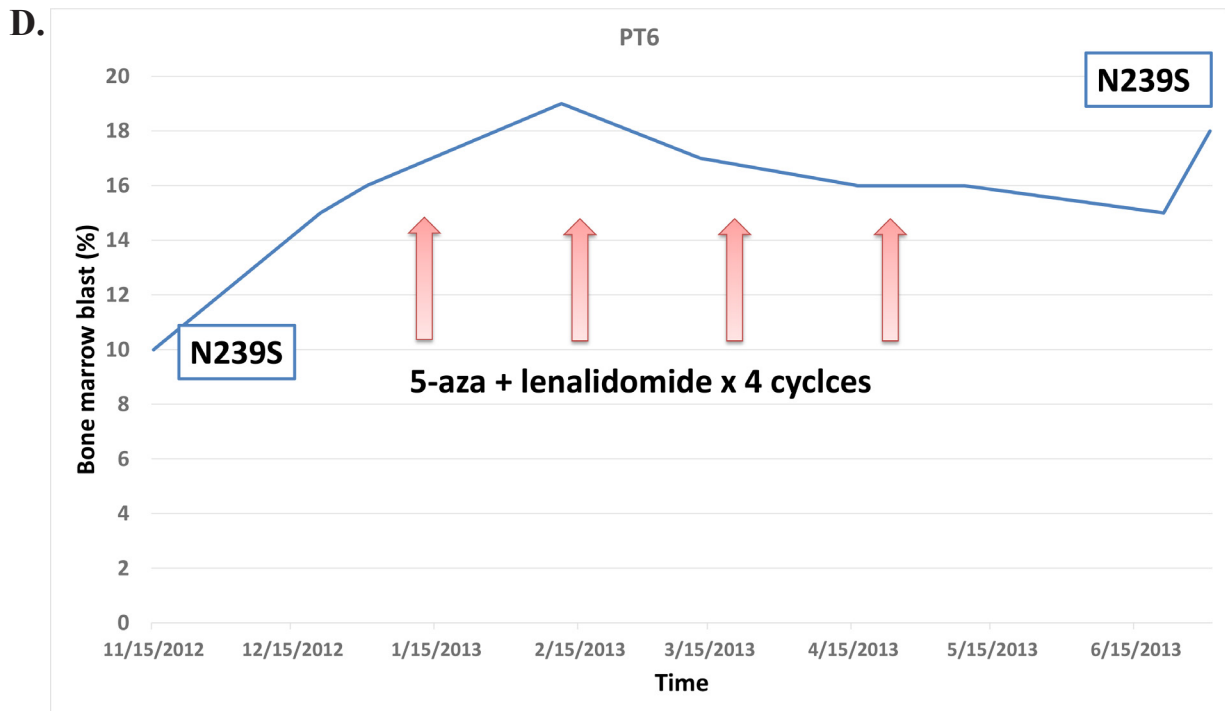

(Continued)

E.

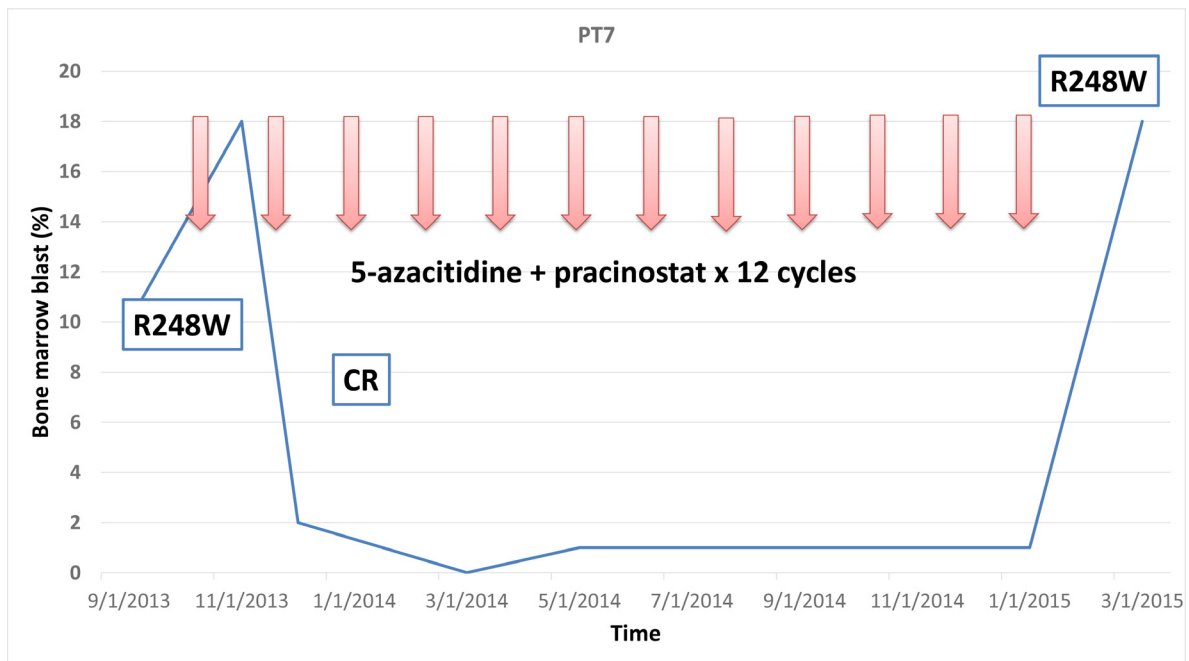

F.

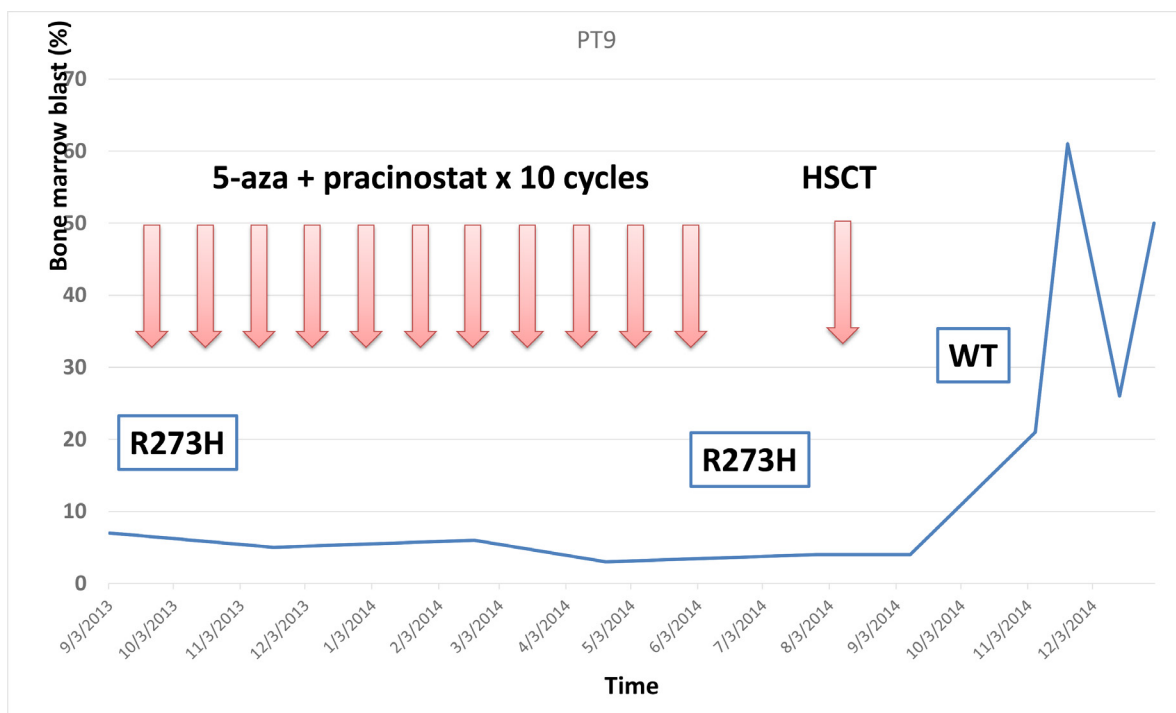

(Continued)

G.

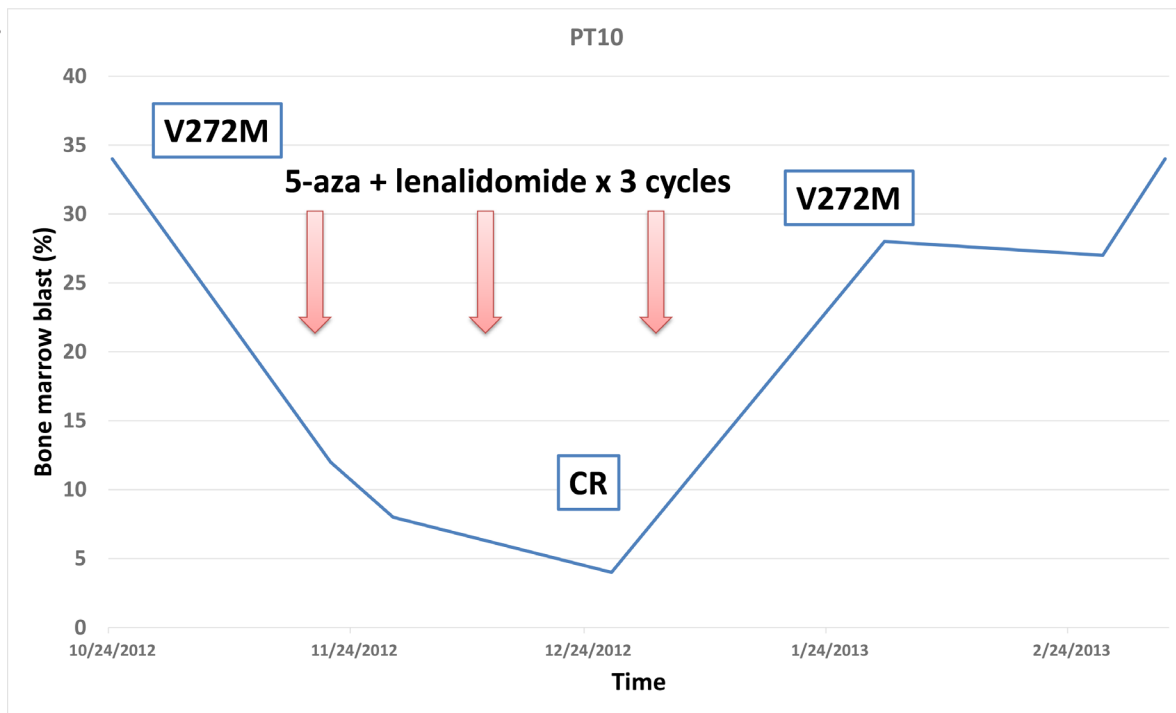

H.

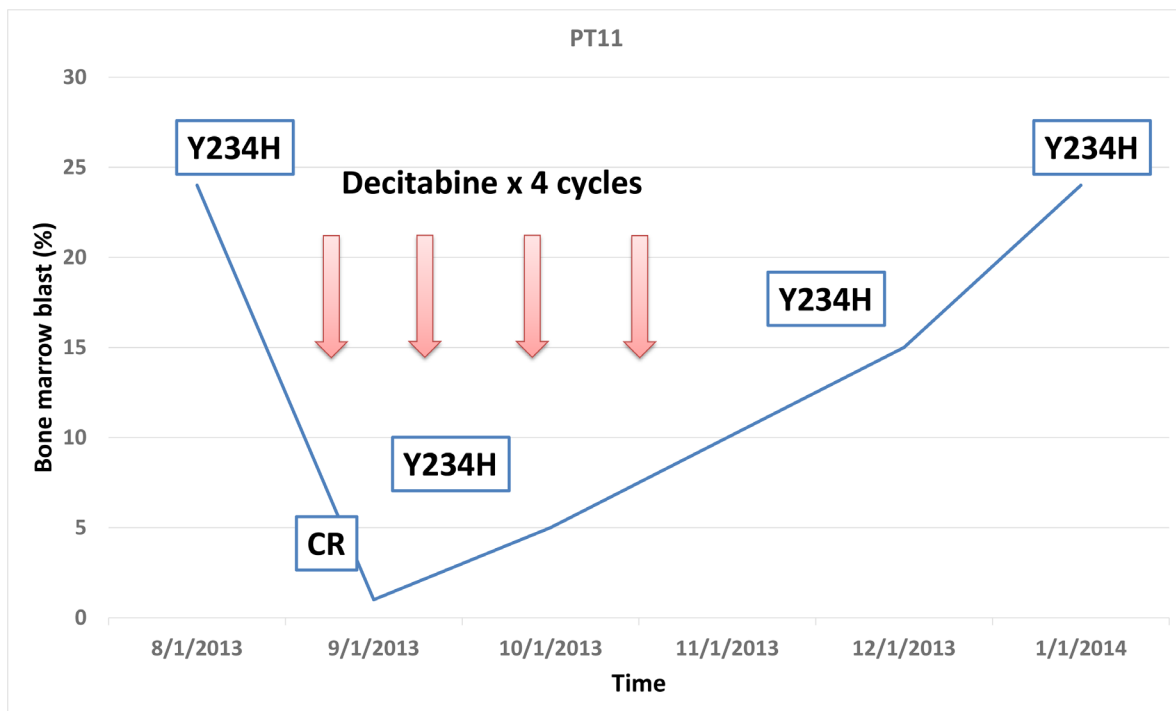

(Continued)

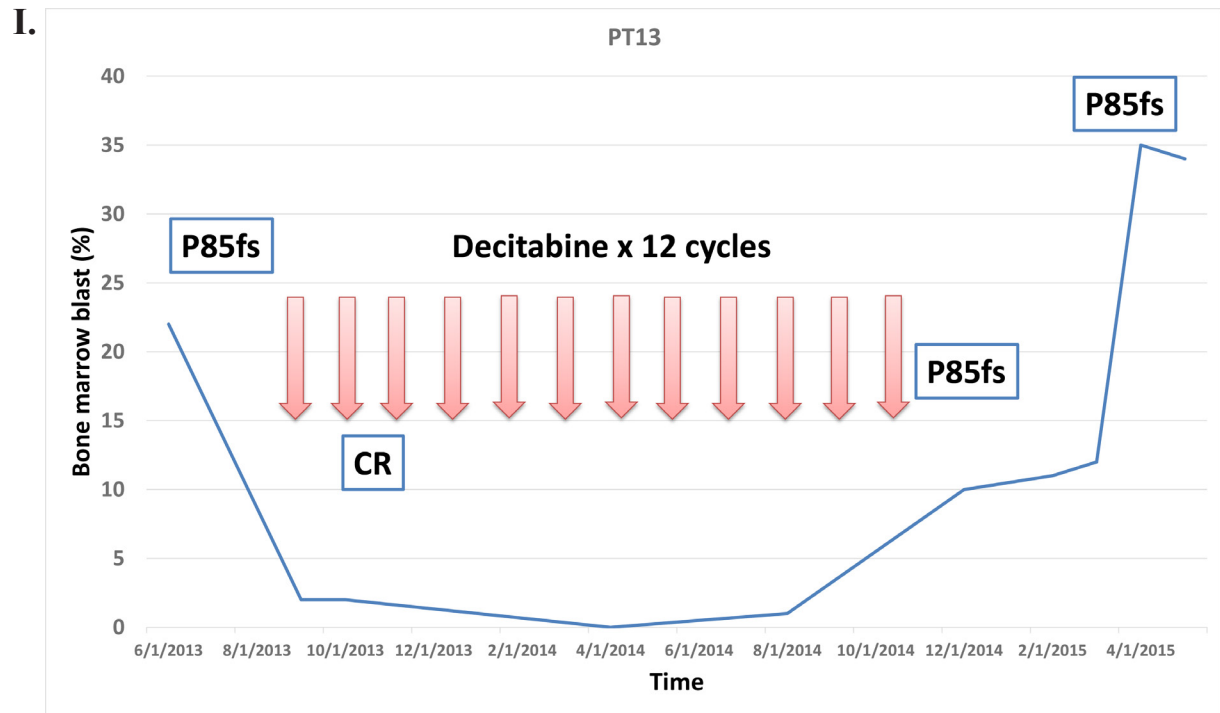

Supplementary Figure S3: Other cases with longitudinal *TP53* mutation follow up that are not listed in Figure 5.
